# Supplementary material for: The Socioeconomic Impact of Coastal Environment Changes on Fishing Communities and Adaptation Strategies
Source: MDPI journal article supplement (doi:10.3390/fishes7050243), 2022-09-16
Supplement: s1 [file s1]

Archive with 1 entries (1 files):
- fishes-1866148-supplementary.pdf
