# Supplementary material for: The Socioeconomic Impact of Coastal Environment Changes on Fishing Communities and Adaptation Strategies
Source: MDPI journal article supplement (doi:10.3390/fishes7050243), 2022-09-16
Supplement: s1 [file s1 › fishes-1866148-supplementary.pdf]

## Supplementary

**Table S1.** Items for the In-depth Interviews.

| No. | Question                                                                                                                                                                                                                                                                 |
|-----|--------------------------------------------------------------------------------------------------------------------------------------------------------------------------------------------------------------------------------------------------------------------------|
| 1   | How do you think the environmental change on Waisanding Sandbar will affect the development of fishing communities in Chiayi?                                                                                                                                            |
| 2   | As the main producing area of Chiayi's oyster farming is located on Waisanding Sandbar, what are the key factors affecting the sustainable development of oyster farming?                                                                                                |
| 3   | What are the difficulties or challenges facing the operation of Chiayi's oyster farming industry (or recreational fishery)? What are the main issues in your opinion?                                                                                                    |
| 4   | What do you think are the strategies to improve or avoid environmental change on Waisanding Sandbar?                                                                                                                                                                     |
| 5   | Suppose the oyster business is facing increasing difficulties that will affect the social economy of fishing communities. To pursue the sustainable development of fishing communities, what strategies do you think are more effective to avoid or mitigate the impact? |

**Table S2.** Interviewees in both rounds of focus group interviews.

| Round 1       |                          | Round 2    |                                              |
|---------------|--------------------------|------------|----------------------------------------------|
| A             | Chiayi County Government | A, B       | Fisheries agency                             |
| B             | Fisheries organization   | C          | Chiayi County Government                     |
| C, D, E, F, G | Oyster aquafarmers       | D          | Dongshih Township office                     |
| H             | Tourism fishing operator | E          | Scholar                                      |
|               |                          | F          | Fisheries organization                       |
|               |                          | G          | Chiayi Dongshih Nautical Tourism Association |
|               |                          | H, I, J, K | Oyster aquafarmers                           |

**Table S3.** AHP questionnaire: Aquafarmer interviewees.

| No. | Years of Experience | Floating Rack Area (beds) | Cradle Rack Area (ha) |
|-----|---------------------|---------------------------|-----------------------|
| 1   | 45                  | 60                        | 0.5                   |
| 2   | 8                   | 0                         | 0.6                   |
| 3   | 40                  | 10                        | 3                     |
| 4   | 3                   | 50                        | 0.5                   |
| 5   | 40                  | 100                       | 0.9                   |
| 6   | 15                  | 20                        | 0.6                   |
| 7   | 14                  | 15                        | 0.25                  |
| 8   | 10                  | 20                        | 0.5                   |
| 9   | 10                  | 0                         | 0.6                   |
| 10  | 5                   | 15                        | 0                     |
| 11  | 2                   | 5                         | 0                     |
| 12  | 20                  | 100                       | 0                     |
| 13  | 5                   | 20                        | 0                     |
| 14  | 50                  | 70                        | 0.8                   |
| 15  | 3.5                 | 30                        | 0.8                   |
| 16  | 40                  | 25                        | 0.95                  |
| 17  | 35                  | 30                        | 0.8                   |
| 18  | 15                  | 15                        | 0.68                  |
| 19  | 30                  | 36                        | 0                     |

**Table S4.** Import volume and average price of major oyster importing countries in Taiwan's markets over the years.

Unit: metric ton, NT dollar/kg

| Country | Vietnam       |               | Japan         |               | South Korea   |               | The U.S.      |               |
|---------|---------------|---------------|---------------|---------------|---------------|---------------|---------------|---------------|
| Year    | Import volume | Average price |
| 2012    | 26            | 23            | 68            | 288           | 287           | 97            | 405           | 61            |
| 2013    | 75            | 31            | 90            | 239           | 245           | 123           | 323           | 47            |
| 2014    | 48            | 34            | 148           | 227           | 408           | 118           | 412           | 53            |
| 2015    | 59            | 36            | 290           | 196           | 371           | 133           | 466           | 70            |
| 2016    | 74            | 56            | 182           | 318           | 350           | 140           | 384           | 60            |
| 2017    | 150           | 69            | 290           | 217           | 352           | 123           | 386           | 50            |
| 2018    | 34            | 78            | 750           | 177           | 369           | 117           | 432           | 55            |
| 2019    | 201           | 79            | 667           | 216           | 466           | 130           | 396           | 70            |
| 2020    | 1356          | 72            | 660           | 205           | 299           | 125           | 156           | 78            |
| 2021    | 1786          | 74            | 894           | 193           | 491           | 129           | 164           | 69            |

Note: The average farm price in Chiayi in 2021 was approximately NT\$250-280 per kilogram.

Source: Agricultural statistics <https://agrstat.coa.gov.tw/sdweb/public/trade/TradeCoa.aspx>
